# Supplementary material for: Downscaling land use and land cover from the Global Change Assessment Model for coupling with Earth system models
Source: Copernicus journal article supplement (doi:10.5194/gmd-2016-75), 2016-05-23
Supplement: Supplementary file 1 [file gmd-2016-75-supplement.pdf]

# Downscaling of landuse and landcover from the Global Change Assessment Model for coupling with Earth System and Agricultural models.

## Supplementary Material

|                                                                                                                                             |                                     |
|---------------------------------------------------------------------------------------------------------------------------------------------|-------------------------------------|
| <b>DOWNSCALING OF LANDUSE AND LANDCOVER FROM THE GLOBAL CHANGE ASSESSMENT MODEL FOR COUPLING WITH EARTH SYSTEM AND AGRICULTURAL MODELS.</b> | <b>1</b>                            |
| <b>A. GCAM OVERVIEW</b>                                                                                                                     | <b>1</b>                            |
| <b>B. ALTERNATIVE CONFIGURATIONS FOR THE SENSITIVITY ANALYSIS</b>                                                                           | <b>2</b>                            |
| <b>C. ALTERNATIVE CONFIGURATIONS FOR THE SENSITIVITY ANALYSIS</b>                                                                           | <b>ERROR! BOOKMARK NOT DEFINED.</b> |

### A. GCAM overview

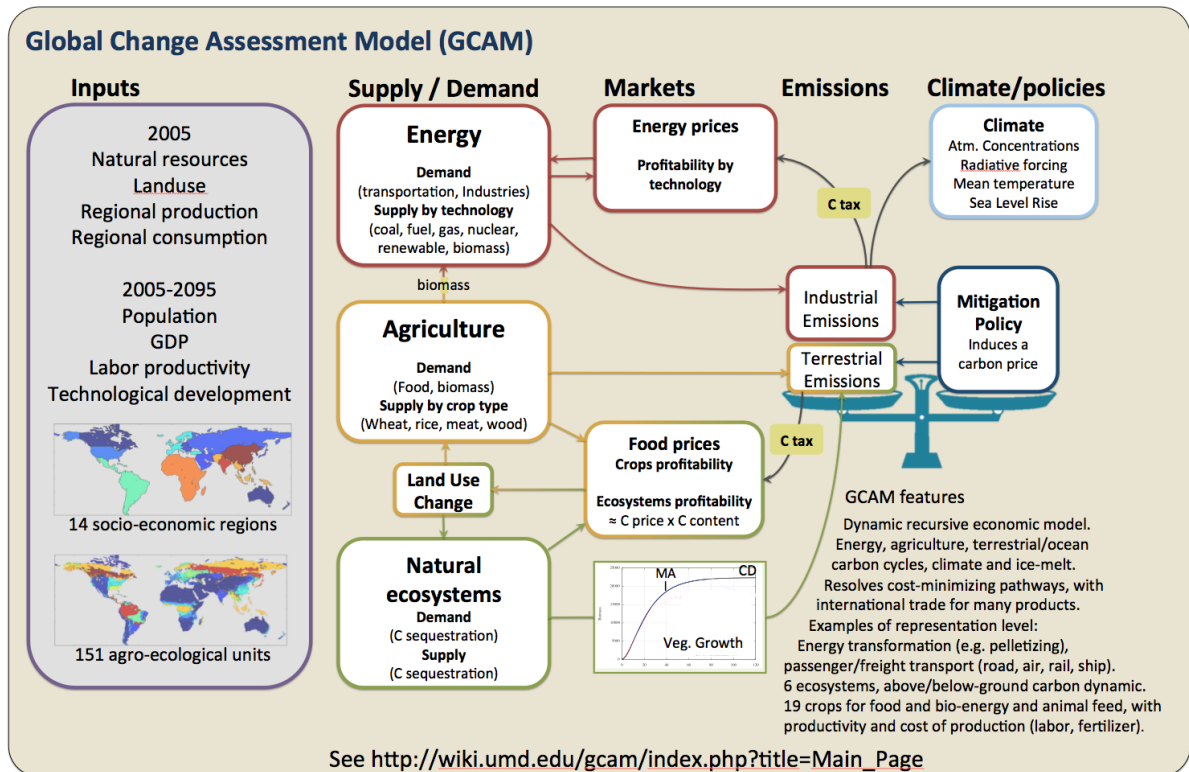

Figure S1. GCAM diagram.

## B. Alternative configurations for the sensitivity analysis

Tables S 1. Configurations of the treatment order for the sensitivity analysis.

| a) Common land types | Treatment order | b) Common land types | Treatment order | c) Common land types | Treatment order |
|----------------------|-----------------|----------------------|-----------------|----------------------|-----------------|
| forest               | 5               | forest               | 2               | forest               | 1               |
| shrub                | 7               | shrub                | 4               | shrub                | 3               |
| grass                | 6               | grass                | 3               | grass                | 2               |
| crops                | 4               | crops                | 1               | crops                | 4               |
| urban                | 1               | urban                | 5               | urban                | 5               |
| snow                 | 2               | snow                 | 6               | snow                 | 6               |
| sparse               | 3               | sparse               | 7               | sparse               | 7               |

  

| d) Common land types | Treatment order | e) Common land types | Treatment order | f) Common land types | Treatment order |
|----------------------|-----------------|----------------------|-----------------|----------------------|-----------------|
| forest               | 4               | forest               | 3               | forest               | 2               |
| shrub                | 6               | shrub                | 2               | shrub                | 1               |
| grass                | 5               | grass                | 1               | grass                | 3               |
| crops                | 7               | crops                | 4               | crops                | 4               |
| urban                | 1               | urban                | 5               | urban                | 5               |
| snow                 | 2               | snow                 | 6               | snow                 | 6               |
| sparse               | 3               | sparse               | 7               | sparse               | 7               |

Tables S 2. Configurations of the FLT transition priorities for the sensitivity analysis.

| a) Common land types | Common land types for downscaling |       |       |       |       |      |        |
|----------------------|-----------------------------------|-------|-------|-------|-------|------|--------|
|                      | forest                            | shrub | grass | crops | urban | snow | sparse |
| forest               | 0                                 | 1     | 2     | 3     | 4     | 6    | 5      |
| shrub                | 5                                 | 0     | 4     | 6     | 1     | 3    | 2      |
| grass                | 6                                 | 5     | 0     | 4     | 1     | 3    | 2      |
| crops                | 4                                 | 3     | 2     | 0     | 1     | 6    | 5      |
| urban                | 5                                 | 3     | 2     | 4     | 0     | 6    | 1      |
| snow                 | 6                                 | 5     | 4     | 3     | 2     | 0    | 1      |
| sparse               | 6                                 | 4     | 2     | 3     | 5     | 1    | 0      |

  

| b) Common land types | Common land types for downscaling |       |       |       |       |      |        |
|----------------------|-----------------------------------|-------|-------|-------|-------|------|--------|
|                      | forest                            | shrub | grass | crops | urban | snow | sparse |
| forest               | 0                                 | 1     | 2     | 3     | 4     | 6    | 5      |
| shrub                | 5                                 | 0     | 4     | 6     | 1     | 3    | 2      |
| grass                | 6                                 | 5     | 0     | 4     | 1     | 3    | 2      |
| crops                | 3                                 | 2     | 4     | 0     | 1     | 6    | 5      |
| urban                | 5                                 | 3     | 2     | 4     | 0     | 6    | 1      |
| snow                 | 6                                 | 5     | 4     | 3     | 2     | 0    | 1      |
| sparse               | 6                                 | 4     | 2     | 3     | 5     | 1    | 0      |

| <b>c) Common land types</b> | <b>Common land types for downscaling</b> |       |       |       |       |      |        |
|-----------------------------|------------------------------------------|-------|-------|-------|-------|------|--------|
|                             | forest                                   | shrub | grass | crops | urban | snow | sparse |
| forest                      | 0                                        | 1     | 2     | 3     | 4     | 6    | 5      |
| shrub                       | 5                                        | 0     | 4     | 6     | 1     | 3    | 2      |
| grass                       | 6                                        | 5     | 0     | 4     | 1     | 3    | 2      |
| crops                       | 2                                        | 3     | 4     | 0     | 1     | 6    | 5      |
| urban                       | 5                                        | 3     | 2     | 4     | 0     | 6    | 1      |
| snow                        | 6                                        | 5     | 4     | 3     | 2     | 0    | 1      |
| sparse                      | 6                                        | 4     | 2     | 3     | 5     | 1    | 0      |

| <b>d) Common land types</b> | <b>Common land types for downscaling</b> |       |       |       |       |      |        |
|-----------------------------|------------------------------------------|-------|-------|-------|-------|------|--------|
|                             | forest                                   | shrub | grass | crops | urban | snow | sparse |
| forest                      | 0                                        | 3     | 2     | 1     | 4     | 6    | 5      |
| shrub                       | 6                                        | 0     | 5     | 4     | 1     | 3    | 2      |
| grass                       | 4                                        | 5     | 0     | 6     | 1     | 3    | 2      |
| crops                       | 4                                        | 3     | 2     | 0     | 1     | 6    | 5      |
| urban                       | 5                                        | 3     | 2     | 1     | 0     | 6    | 4      |
| snow                        | 6                                        | 5     | 4     | 3     | 2     | 0    | 1      |
| sparse                      | 6                                        | 4     | 2     | 3     | 5     | 1    | 0      |

| <b>e) Common land types</b> | <b>Common land types for downscaling</b> |       |       |       |       |      |        |
|-----------------------------|------------------------------------------|-------|-------|-------|-------|------|--------|
|                             | forest                                   | shrub | grass | crops | urban | snow | sparse |
| forest                      | 0                                        | 3     | 1     | 2     | 4     | 6    | 5      |
| shrub                       | 4                                        | 0     | 6     | 5     | 1     | 3    | 2      |
| grass                       | 6                                        | 4     | 0     | 5     | 1     | 3    | 2      |
| crops                       | 4                                        | 3     | 2     | 0     | 1     | 6    | 5      |
| urban                       | 5                                        | 4     | 1     | 2     | 0     | 6    | 3      |
| snow                        | 6                                        | 5     | 4     | 3     | 2     | 0    | 1      |
| sparse                      | 6                                        | 4     | 2     | 3     | 5     | 1    | 0      |

| <b>f) Common land types</b> | <b>Common land types for downscaling</b> |       |       |       |       |      |        |
|-----------------------------|------------------------------------------|-------|-------|-------|-------|------|--------|
|                             | forest                                   | shrub | grass | crops | urban | snow | sparse |
| forest                      | 0                                        | 3     | 2     | 1     | 4     | 6    | 5      |
| shrub                       | 6                                        | 0     | 5     | 4     | 1     | 3    | 2      |
| grass                       | 4                                        | 5     | 0     | 6     | 1     | 3    | 2      |
| crops                       | 2                                        | 3     | 4     | 0     | 1     | 6    | 5      |
| urban                       | 5                                        | 3     | 2     | 1     | 0     | 6    | 4      |
| snow                        | 6                                        | 5     | 4     | 3     | 2     | 0    | 1      |
| sparse                      | 6                                        | 4     | 2     | 3     | 5     | 1    | 0      |

# C. Regional-scale sensitivity analysis

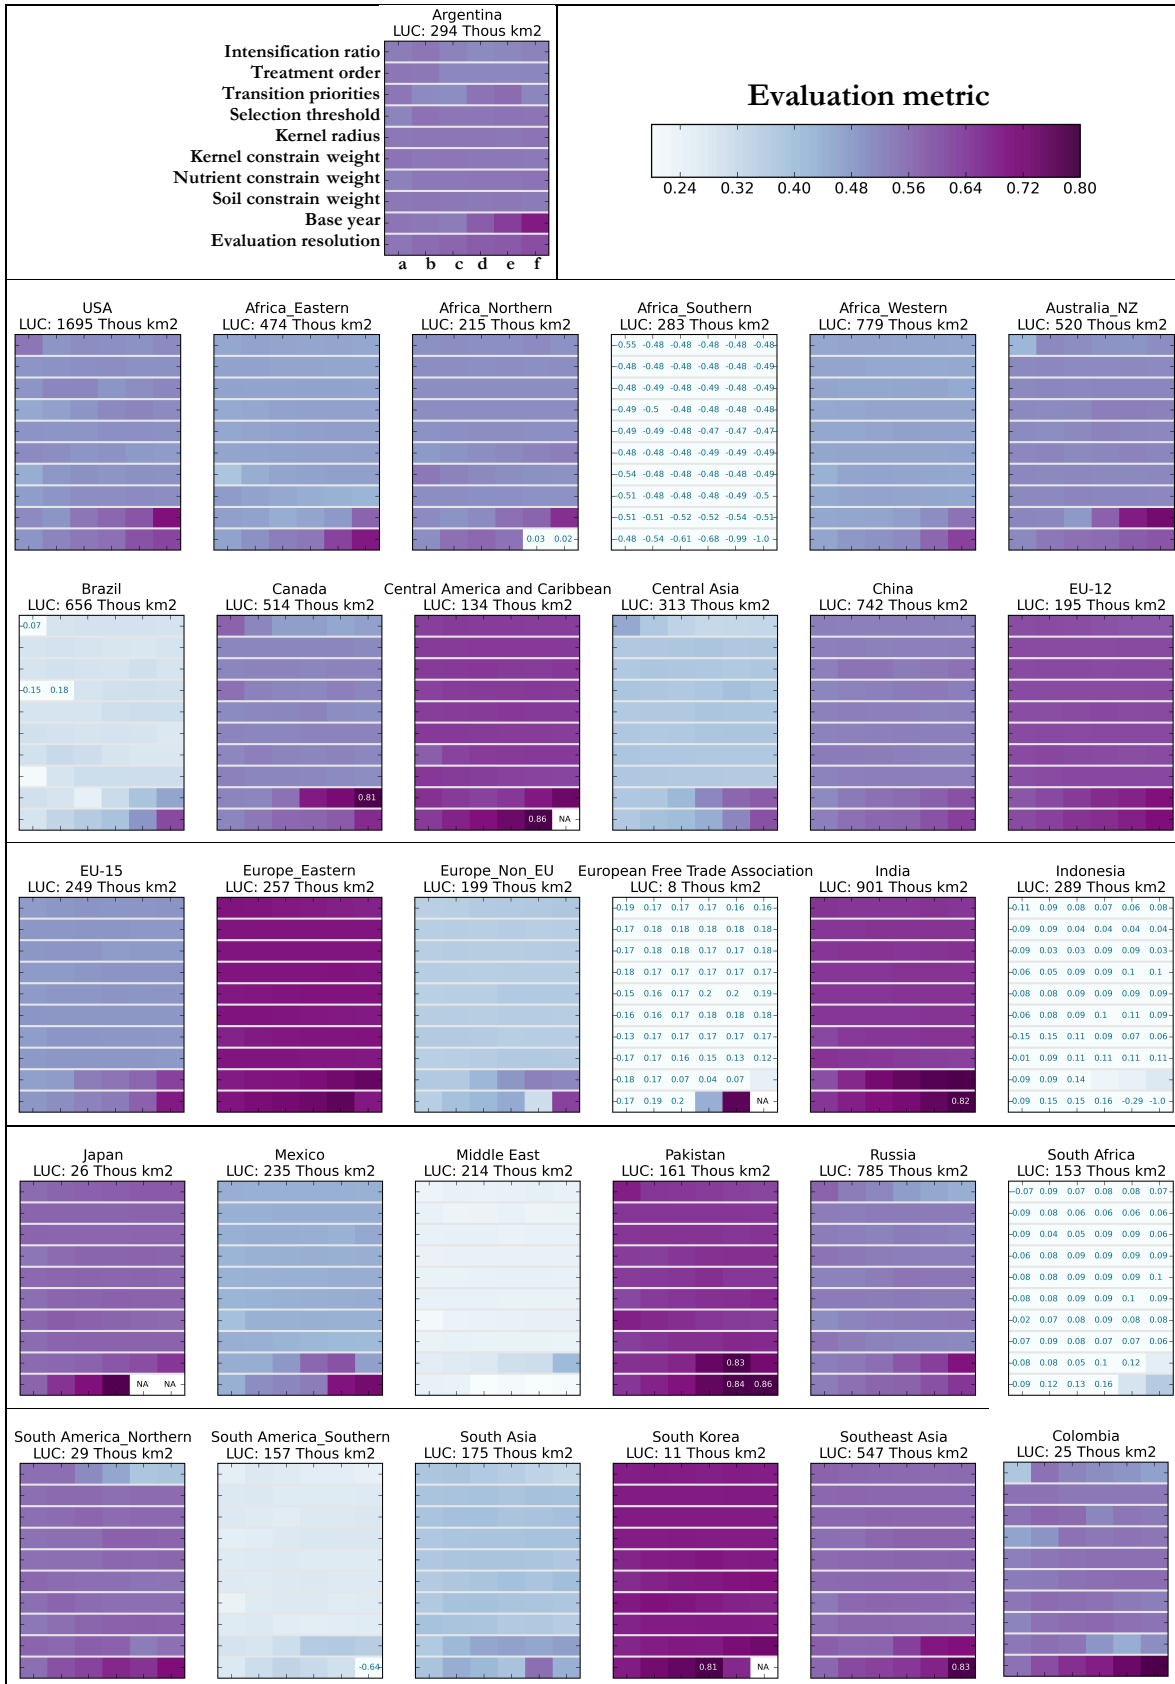

Figure S2. Results of the sensitivity analysis at the GCAM region scale.

## D. Configuration to downscale 4 types of forests, instead of one single forest type

Table S3: User-defined aggregation of the spatial data to downscale 4 types of forests separately.

| Spatial land types<br>(MODIS PFTs) | Common land types for downscaling |          |          |          |          |          |          |          |          |          |
|------------------------------------|-----------------------------------|----------|----------|----------|----------|----------|----------|----------|----------|----------|
|                                    | ENF                               | EBF      | DNF      | DBF      | shrub    | grass    | crops    | urban    | snow     | sparse   |
| ev. needl. (ENF)                   | <b>1</b>                          | 0        | 0        | 0        | 0        | 0        | 0        | 0        | 0        | 0        |
| ev. broad. (EBF)                   | 0                                 | <b>1</b> | 0        | 0        | 0        | 0        | 0        | 0        | 0        | 0        |
| dec. needl. (DNF)                  | 0                                 | 0        | <b>1</b> | 0        | 0        | 0        | 0        | 0        | 0        | 0        |
| dec. broad. (DBF)                  | 0                                 | 0        | 0        | <b>1</b> | 0        | 0        | 0        | 0        | 0        | 0        |
| shrub                              | 0                                 | 0        | 0        | 0        | <b>1</b> | 0        | 0        | 0        | 0        | 0        |
| grass                              | 0                                 | 0        | 0        | 0        | 0        | <b>1</b> | 0        | 0        | 0        | 0        |
| crops                              | 0                                 | 0        | 0        | 0        | 0        | 0        | <b>1</b> | 0        | 0        | 0        |
| urban                              | 0                                 | 0        | 0        | 0        | 0        | 0        | 0        | <b>1</b> | 0        | 0        |
| snow                               | 0                                 | 0        | 0        | 0        | 0        | 0        | 0        | 0        | <b>1</b> | 0        |
| sparse                             | 0                                 | 0        | 0        | 0        | 0        | 0        | 0        | 0        | 0        | <b>1</b> |

Table S4: User-defined aggregation of the GCAM data to downscale 4 types of forests separately.

| GCAM land types  | Common land types for downscaling |          |          |          |          |          |          |          |          |          |
|------------------|-----------------------------------|----------|----------|----------|----------|----------|----------|----------|----------|----------|
|                  | ENF                               | EBF      | DNF      | DBF      | shrub    | grass    | crops    | urban    | snow     | sparse   |
| Corn             | 0                                 | 0        | 0        | 0        | 0        | 0        | <b>1</b> | 0        | 0        | 0        |
| Wheat            | 0                                 | 0        | 0        | 0        | 0        | 0        | <b>1</b> | 0        | 0        | 0        |
| Rice             | 0                                 | 0        | 0        | 0        | 0        | 0        | <b>1</b> | 0        | 0        | 0        |
| Root_Tuber       | 0                                 | 0        | 0        | 0        | 0        | 0        | <b>1</b> | 0        | 0        | 0        |
| OilCrop          | 0                                 | 0        | 0        | 0        | 0        | 0        | <b>1</b> | 0        | 0        | 0        |
| SugarCrop        | 0                                 | 0        | 0        | 0        | 0        | 0        | <b>1</b> | 0        | 0        | 0        |
| OtherGrain       | 0                                 | 0        | 0        | 0        | 0        | 0        | <b>1</b> | 0        | 0        | 0        |
| FiberCrop        | 0                                 | 0        | 0        | 0        | 0        | 0        | <b>1</b> | 0        | 0        | 0        |
| FodderGrass      | 0                                 | 0        | 0        | 0        | 0        | 0        | <b>1</b> | 0        | 0        | 0        |
| FodderHerb       | 0                                 | 0        | 0        | 0        | 0        | 0        | <b>1</b> | 0        | 0        | 0        |
| Biomass          | 0                                 | 0        | 0        | 0        | 0        | 0        | <b>1</b> | 0        | 0        | 0        |
| MiscCrop         | 0                                 | 0        | 0        | 0        | 0        | 0        | <b>1</b> | 0        | 0        | 0        |
| OtherArableLand  | 0                                 | 0        | 0        | 0        | 0        | 0        | <b>1</b> | 0        | 0        | 0        |
| PalmFruit        | 0                                 | 0        | 0        | 0        | 0        | 0        | <b>1</b> | 0        | 0        | 0        |
| Pasture          | 0                                 | 0        | 0        | 0        | 0        | <b>1</b> | 0        | 0        | 0        | 0        |
| UnmanagedPasture | 0                                 | 0        | 0        | 0        | 0        | <b>1</b> | 0        | 0        | 0        | 0        |
| UrbanLand        | 0                                 | 0        | 0        | 0        | 0        | 0        | 0        | <b>1</b> | 0        | 0        |
| willow           | <b>1</b>                          | <b>1</b> | <b>1</b> | <b>1</b> | 0        | 0        | 0        | 0        | 0        | 0        |
| Forest           | <b>1</b>                          | <b>1</b> | <b>1</b> | <b>1</b> | 0        | 0        | 0        | 0        | 0        | 0        |
| UnmanagedForest  | <b>1</b>                          | <b>1</b> | <b>1</b> | <b>1</b> | 0        | 0        | 0        | 0        | 0        | 0        |
| Shrubland        | 0                                 | 0        | 0        | 0        | <b>1</b> | 0        | 0        | 0        | 0        | 0        |
| Grassland        | 0                                 | 0        | 0        | 0        | 0        | <b>1</b> | 0        | 0        | 0        | 0        |
| Tundra           | 0                                 | 0        | 0        | 0        | 0        | <b>1</b> | 0        | 0        | 0        | 0        |
| RockIceDesert    | 0                                 | 0        | 0        | 0        | 0        | 0        | 0        | 0        | <b>1</b> | <b>1</b> |

**Table S5: User-defined treatment order to downscale 4 types of forests separately. ENF: Evergreen needle-leaf forest; EBF Evergreen broadleaf forest; DNF: Deciduous needle-leaf forest; DBF: Deciduous broadleaf forest.**

| <b>Common land types</b> | <b>Treatment order</b> |
|--------------------------|------------------------|
| ENF                      | 5                      |
| EBF                      | 6                      |
| DNF                      | 7                      |
| DBF                      | 8                      |
| shrub                    | 10                     |
| grass                    | 9                      |
| crops                    | 4                      |
| urban                    | 1                      |
| snow                     | 2                      |
| sparse                   | 3                      |

**Table S6: User-defined transition priorities to downscale 4 types of forests separately.**

| <b>Common land types</b> | <b>Common land types for downscaling</b> |     |     |     |       |       |       |       |      |        |
|--------------------------|------------------------------------------|-----|-----|-----|-------|-------|-------|-------|------|--------|
|                          | ENF                                      | EBF | DNF | DBF | shrub | grass | crops | urban | snow | sparse |
| ENF                      | 0                                        | 1   | 2   | 3   | 4     | 5     | 6     | 7     | 8    | 9      |
| EBF                      | 1                                        | 0   | 2   | 3   | 4     | 5     | 6     | 7     | 8    | 9      |
| DNF                      | 1                                        | 2   | 0   | 3   | 4     | 5     | 6     | 7     | 8    | 9      |
| DBF                      | 1                                        | 2   | 3   | 0   | 4     | 5     | 6     | 7     | 8    | 9      |
| shrub                    | 5                                        | 6   | 7   | 8   | 0     | 4     | 9     | 1     | 3    | 2      |
| grass                    | 6                                        | 7   | 8   | 9   | 5     | 0     | 4     | 1     | 3    | 2      |
| crops                    | 4                                        | 5   | 6   | 7   | 3     | 2     | 0     | 1     | 9    | 8      |
| urban                    | 5                                        | 6   | 7   | 8   | 3     | 2     | 4     | 0     | 9    | 1      |
| snow                     | 6                                        | 7   | 8   | 9   | 5     | 4     | 3     | 2     | 0    | 1      |
| sparse                   | 6                                        | 7   | 8   | 9   | 4     | 2     | 3     | 5     | 1    | 0      |
